# Supplementary material
Source: publisher figshare collection journal article supplement (https://gsajournals.figshare.com/ndownloader/files/13687643)
Supplement: Supplementary file 1 [file 13687643]

**Table S12: *WHI2* primers**

**Primers**

**SV125** 5’ ATTGATAAAGATAAAGGTTGTCTGAGCTTACACTTATTATAAACAcagctgaagcttcgtacgctgcagg 3’

**SV126** 5’ TGGCCCGATCTCTTTCCATTTCTTTCTCTAATATATTATATACACcgcataggccactagtggatc 3’

**SV127** 5’TTGTGTCTTTGGCCCGATCTC 3’

**SV128** 5’GCCATGTTCAATGGCCAATTTCT 3’

**SV141** 5’AGTCAGAgtcgacACGGGCCATGTTCA 3’

**SV142** 5’ GAAATATttaattaaCTAGCAGTCTTCGACGC 3’
